# Supplementary material for: Calcium-driven regulation of voltage-sensing domains in BK channels
Source: eLife journal article supplement (doi:10.7554/elife.44934), 2019-09-11
Supplement: supp [file elife-44934-supp-v1.zip]

Archive with 6 entries (6 files):
- elife_poa_e44934_Figure_3_figure_supplement_2.tif
- elife_poa_e44934_Transparent_Reporting_File.pdf
- elife_poa_e44934_Figure_4_figure_supplement_1.tif
- elife_poa_e44934_Figure_2_figure_supplement_1.tif
- elife_poa_e44934_Figure_2_figure_supplement_2.tif
- elife_poa_e44934_Figure_3_figure_supplement_1.tif
